# Supplementary material
Source: Elsevier journal article supplement (https://www.sciencedirect.com/science/article/pii/S2237936316300764)
Supplement: mmc1 [file S2237936316300764:mmc1.pdf]

### Cleveland Clinic Incontinence Score

Please tick one box in each row to indicate on average how often you experience the following:

|                          | Never                    | Rarely<br>Less than<br>once a month | Sometimes<br>Less than<br>once a week | Usually<br>Less than<br>once a day | Always<br>Everyday       |
|--------------------------|--------------------------|-------------------------------------|---------------------------------------|------------------------------------|--------------------------|
| a. Solid stool leakage   | <input type="checkbox"/> | <input type="checkbox"/>            | <input type="checkbox"/>              | <input type="checkbox"/>           | <input type="checkbox"/> |
| b. Liquid stool leakage  | <input type="checkbox"/> | <input type="checkbox"/>            | <input type="checkbox"/>              | <input type="checkbox"/>           | <input type="checkbox"/> |
| c. Gas leakage           | <input type="checkbox"/> | <input type="checkbox"/>            | <input type="checkbox"/>              | <input type="checkbox"/>           | <input type="checkbox"/> |
| d. Pad use (for stool)   | <input type="checkbox"/> | <input type="checkbox"/>            | <input type="checkbox"/>              | <input type="checkbox"/>           | <input type="checkbox"/> |
| e. Lifestyle restriction | <input type="checkbox"/> | <input type="checkbox"/>            | <input type="checkbox"/>              | <input type="checkbox"/>           | <input type="checkbox"/> |

Please fill in the dates of birth of your children and if the delivery was a Normal Vaginal Delivery or a Caesarean Section.

|                       |                    |                 |
|-----------------------|--------------------|-----------------|
| 1 <sup>st</sup> Child | __ / __ / __ __ __ | Delivery: _____ |
| 2 <sup>nd</sup> Child | __ / __ / __ __ __ | Delivery: _____ |
| 3 <sup>rd</sup> Child | __ / __ / __ __ __ | Delivery: _____ |
| 4 <sup>th</sup> Child | __ / __ / __ __ __ | Delivery: _____ |
| Other Children        | __ / __ / __ __ __ | Delivery: _____ |

**Thank you very much for completing this questionnaire**
