# Supplementary material
Source: Elsevier journal article supplement (https://www.sciencedirect.com/science/article/pii/S2237936316300764)
Supplement: mmc2 [file S2237936316300764:mmc2.pdf]

## Fecal Incontinence Quality of Life Instrument

Q 1: In general, would you say your health is:

- 1 ☐ Excellent
- 2 ☐ Very Good
- 3 ☐ Good
- 4 ☐ Fair
- 5 ☐ Poor

Q 2: For each of the items, please indicate how much of the time the issue is a concern for you due to accidental bowel leakage.

| Q2. Due to accidental bowel leakage:                                                     | Most of<br>the Time | Some of<br>The Time | A Little of<br>the Time | None of<br>the Time |
|------------------------------------------------------------------------------------------|---------------------|---------------------|-------------------------|---------------------|
| a. I am afraid to go out                                                                 | 1                   | 2                   | 3                       | 4                   |
| b. I avoid visiting friends                                                              | 1                   | 2                   | 3                       | 4                   |
| c. I avoid staying overnight away from home                                              | 1                   | 2                   | 3                       | 4                   |
| d. It is difficult for me to get out and do things<br>like going to a movie or to church | 1                   | 2                   | 3                       | 4                   |
| e. I cut down on how much I eat before I go out                                          | 1                   | 2                   | 3                       | 4                   |
| f. Whenever I am away from home, I try to stay<br>near a restroom as much as possible    | 1                   | 2                   | 3                       | 4                   |
| g. It is important to plan my schedule (daily<br>activities) around my bowel pattern     | 1                   | 2                   | 3                       | 4                   |
| h. I avoid traveling                                                                     | 1                   | 2                   | 3                       | 4                   |
| i. I worry about not being able to get to the toilet<br>in time                          | 1                   | 2                   | 3                       | 4                   |
| j. I feel I have no control over my bowels                                               | 1                   | 2                   | 3                       | 4                   |
| k. I can't hold my bowel movement long enough<br>to get to the bathroom                  | 1                   | 2                   | 3                       | 4                   |
| l. I leak stool without even knowing it                                                  | 1                   | 2                   | 3                       | 4                   |
| m. I try to prevent bowel accidents by staying<br>very near a bathroom                   | 1                   | 2                   | 3                       | 4                   |

Q 3: Due to accidental bowel leakage, indicate the extent to which you AGREE or DISAGREE with each of the following items.

| Q3. Due to accidental bowel leakage:                                          | Strongly Agree | Somewhat Agree | Somewhat Disagree | Strongly Disagree |
|-------------------------------------------------------------------------------|----------------|----------------|-------------------|-------------------|
| a. I feel ashamed                                                             | 1              | 2              | 3                 | 4                 |
| b. I can not do many of things I want to do                                   | 1              | 2              | 3                 | 4                 |
| c. I worry about bowel accidents                                              | 1              | 2              | 3                 | 4                 |
| d. I feel depressed                                                           | 1              | 2              | 3                 | 4                 |
| e. I worry about others smelling stool on me                                  | 1              | 2              | 3                 | 4                 |
| f. I feel like I am not a healthy person                                      | 1              | 2              | 3                 | 4                 |
| g. I enjoy life less                                                          | 1              | 2              | 3                 | 4                 |
| h. I have sex less often than I would like to                                 | 1              | 2              | 3                 | 4                 |
| i. I feel different from other people                                         | 1              | 2              | 3                 | 4                 |
| j. The possibility of bowel accidents is always on my mind                    | 1              | 2              | 3                 | 4                 |
| k. I am afraid to have sex                                                    | 1              | 2              | 3                 | 4                 |
| l. I avoid traveling by plane or train                                        | 1              | 2              | 3                 | 4                 |
| m. I avoid going out to eat                                                   | 1              | 2              | 3                 | 4                 |
| n. Whenever I go someplace new, I specifically locate where the bathrooms are | 1              | 2              | 3                 | 4                 |

Q 4: During the past month, have you felt so sad, discouraged, hopeless, or had so many problems that you wondered if anything was worthwhile?

- 1 ☐ Extremely So - To the point that I have just about given up
- 2 ☐ Very Much So
- 3 ☐ Quite a Bit
- 4 ☐ Some - Enough to bother me
- 5 ☐ A Little Bit
- 6 ☐ Not At All
